# Supplementary material for: Glioblastoma, IDH- and H3-wildtype in young adults: a rare condition with a distinct clinico-radio-histo-molecular and epigenetic landscape
Source: Research Square preprint supplement (doi:10.21203/rs.3.rs-7473307/v1), 2025-09-08
Supplement: Supplementary file 1 [file 45bb6c7a0aff357d5cb4293d.docx]

**Supplementary Table 2. Predictors of overall survival in the whole series (n=1139). Unadjusted and adjusted**

**hazard ratios by Cox proportional hazards model.**

|  | **Unadjusted Hazard Ratio** | | |  | **Adjusted Hazard Ratio** | | |  | |
| --- | --- | --- | --- | --- | --- | --- | --- | --- | --- |
| **Parameters** | **uHR** | **95% CI** | **p-value** |  | **aHR** | **95% CI** | **p-value** | |  | |
| **Clinical characteristics** |  |  |  |  |  |  |  | |  | |
| Age group  Older adult patients  Young adult patients | 1 (ref)  0.54 | 0.37-0.80 | **0.002** |  | 1 (ref)  0.61 | 0.41-0.90 | **0.013** | |  | |
| Sex  Female  Male | 1 (ref)  1.08 | 0.95-1.22 | 0.230 |  |  |  |  | |  | |
| Increase intracranial pressure at diagnosis  No  Yes | 1 (ref)  0.98 | 0.87-1.11 | 0.764 |  |  |  |  | |  | |
| Neurological deficit at diagnosis  No  Yes | 1 (ref)  1.46 | 1.27-1.67 | **<0.001** |  |  |  |  | |  | |
| Epileptic seizures at diagnosis  No  Yes | 1 (ref)  0.70 | 0.62-0.81 | **<0.001** |  | 1 (ref)  0.78 | 0.69-0.90 | **<0.001** | |  | |
| Preoperative Karnofsky Performance Status score  ≥70  <70 | 1 (ref)  1.99 | 1.73-2.30 | **<0.001** |  |  |  |  | |  | |
| RTOG-RPA class  3-4  5-6 | 1 (ref)  2.04 | 1.80-2.32 | **<0.001** |  |  |  |  | |  | |
| **Imaging characteristics** |  |  |  |  |  |  |  | |  | |
| Contrast enhancement  No  Yes | 1 (ref)  2.01 | 1.28-3.16 | **0.003** |  | 1 (ref)  3.01 | 1.90-4.77 | **<0.001** | |  | |
| Cortical involvement of the CE (n=1123)  No  Yes | 1 (ref)  0.63 | 0.55-0.73 | **<0.001** |  |  |  |  | |  | |
| Ventricle involvement of the CE (n=1123)  No  Yes | 1 (ref)  1.62 | 1.43-1.84 | **<0.001** |  |  |  |  | |  | |
| Multifocal tumour (in FLAIR sequence)  No  Yes | 1 (ref)  1.29 | 1.10-1.52 | **0.002** |  |  |  |  | |  | |
| Tumour volume (cm3), median 28.5cm3  <30 cm3  ≥30 cm3 | 1 (ref)  1.31 | 1.16-1.48 | **<0.001** |  |  |  |  | |  | |
| **Histo-molecular characteristics** |  |  |  |  |  |  |  | |  | |
| MGMT promoter methylation  Unmethylated  Methylated | 1 (ref)  0.69 | 0.56-0.86 | **<0.001** |  |  |  |  | |  | |
| **Treatment-related characteristics** |  |  |  |  |  |  |  | |  | |
| Surgical treatment  Biopsy  Surgical resection | 1 (ref)  0.44 | 0.39-0.50 | **<0.001** |  | 1 (ref)  0.50 | 0.44-0.58 | **<0.001** | |  | |
| Extent of resection of the CE (n=615)  Partial removal  Subtotal and total removal | 1 (ref)  0.52 | 0.42-0.65 | **<0.001** |  |  |  |  | |  | |
| Awake surgical procedure (n=615)  No  Yes | 1 (ref)  0.51 | 0.38-0.68 | **<0.001** |  |  |  |  | |  | |
| Carmustine wafer implantation (n=615)  No  Yes | 1 (ref)  1.07 | 0.90-1.27 | 0.464 |  |  |  |  | |  | |
| Adverse postoperative events*  No  Yes | 1 (ref)  1.17 | 0.90-1.52 | 0.245 |  |  |  |  | |  | |
| Postoperative Karnofsky Performance Status score  ≥70  <70 | 1 (ref)  2.45 | 2.13-2.83 | **<0.001** |  | 1 (ref)  1.82 | 1.57-2.11 | **<0.001** | |  | |
| Complete Stupp protocol (n=1114 available)  No  Yes | 1 (ref)  0.30 | 0.26-0.34 | **<0.001** |  | 1 (ref)  0.34 | 0.30-0.39 | **<0.001** | |  | |
| Delay to oncological treatment (n=800 available)  ≤ 8 weeks  > 8 weeks | 1 (ref)  1.05 | 0.80-1.39 | 0.730 |  |  |  |  | |  | |

CI: confidence interval; HR: Hazard ratio. * adverse postoperative events within the first postoperative month (hematoma requiring surgical evacuation, postoperative seizures, hydrocephalus
