# Supplementary material for: Glioblastoma, IDH- and H3-wildtype in young adults: a rare condition with a distinct clinico-radio-histo-molecular and epigenetic landscape
Source: Research Square preprint supplement (doi:10.21203/rs.3.rs-7473307/v1), 2025-09-08
Supplement: Supplementary file 2 [file a851058779f08f747b3c9c3c.docx]

**Supplementary Table 3. Predictors of progression-free survival in young adult patients (n=33). Unadjusted and adjusted**

**hazard ratios by Cox proportional hazards model.**

|  | **Unadjusted Hazard Ratio** | | |  | **Adjusted Hazard Ratio** | | |  | |
| --- | --- | --- | --- | --- | --- | --- | --- | --- | --- |
| **Parameters** | **uHR** | **95% CI** | **p-value** |  | **aHR** | **95% CI** | **p-value** | |  | |
| **Clinical characteristics** |  |  |  |  |  |  |  | |  | |
| Sex  Female  Male | 1 (ref)  1.04 | 0.50-2.19 | 0.910 |  |  |  |  | |  | |
| Increase intracranial pressure at diagnosis  No  Yes | 1 (ref)  0.77 | 0.35-1.70 | 0.521 |  |  |  |  | |  | |
| Neurological deficit at diagnosis  No  Yes | 1 (ref)  1.32 | 0.62-2.77 | 0.472 |  |  |  |  | |  | |
| Epileptic seizures at diagnosis  No  Yes | 1 (ref)  0.83 | 0.40-1.74 | 0.622 |  |  |  |  | |  | |
| Preoperative Karnofsky Performance Status score  ≥70  <70 | 1 (ref)  2.77 | 1.00-7.64 | **0.050** |  |  |  |  | |  | |
| **Imaging characteristics** |  |  |  |  |  |  |  | |  | |
| Contrast enhancement  No  Yes | 1 (ref)  1.63 | 0.38-6.92 | 0.509 |  |  |  |  | |  | |
| Cortical involvement of the CE (n=30)  No  Yes | 1 (ref)  0.16 | 0.05-0.55 | **0.004** |  |  |  |  | |  | |
| Ventricle involvement of the CE (n=30)  No  Yes | 1 (ref)  1.41 | 0.65-3.08 | 0.388 |  |  |  |  | |  | |
| Multifocal tumour (in FLAIR sequence)  No  Yes | 1 (ref)  1.25 | 0.29-5.35 | 0.762 |  |  |  |  | |  | |
| Tumour volume (cm3), median 28.5cm3  <30 cm3  ≥30 cm3 | 1 (ref)  0.79 | 0.36-1.76 | 0.565 |  |  |  |  | |  | |
| **Histo-molecular characteristics** |  |  |  |  |  |  |  | |  | |
| MGMT promoter methylation  Unmethylated  Methylated | 1 (ref)  1.11 | 0.53-2.35 | 0.779 |  | 1 (ref)  0.57 | 0.18-1.73 | 0.320 | |  | |
| **Epigenetic characteristics** |  |  |  |  |  |  |  | |  | |
| DNA-methylation class  Pediatric HGG  Mesenchymal  RTK group | 1 (ref)  1.68  2.51 | 0.50-5.60  0.77-8.15 | 0.401  0.126 |  | 1 (ref)  4.15  6.26 | 0.93 -18.4  1.27-30.8 | 0.062  **0.024** | |  | |
| **Treatment-related characteristics** |  |  |  |  |  |  |  | |  | |
| Surgical treatment  Biopsy  Surgical resection | 1 (ref)  0.30 | 0.13-0.71 | **0.006** |  | 1 (ref)  0.31 | 0.10-0.93 | **0.037** | |  | |
| Extent of resection of the CE (n=23)  Partial removal  Subtotal and total removal | 1 (ref)  0.32 | 0.06-1.57 | 0.159 |  |  |  |  | |  | |
| Awake surgical procedure (n=23)  No  Yes | 1 (ref)  0.55 | 0.16-1.89 | 0.342 |  |  |  |  | |  | |
| Adverse postoperative events*  No  Yes | 1 (ref)  0.88 | 0.17-4.54 | 0.880 |  |  |  |  | |  | |
| Postoperative Karnofsky Performance Status score  ≥70  <70 | 1 (ref)  2.29 | 0.55 -9.53 | 0.256 |  |  |  |  | |  | |
| Complete Stupp protocol  No  Yes | 1 (ref)  0.09 | 0.01-0.85 | **0.036** |  | 1 (ref)  0.25 | 0.07-0.85 | **0.027** | |  | |
| Delay to oncological treatment  ≤ 8 weeks  > 8 weeks | 1 (ref)  0.59 | 0.08-4.59 | 0.616 |  |  |  |  | |  | |

CI: confidence interval; HR: Hazard ratio. * adverse postoperative events within the first postoperative month (hematoma requiring surgical evacuation, postoperative seizures, hydrocephalus
