# Supplementary material for: Glioblastoma, IDH- and H3-wildtype in young adults: a rare condition with a distinct clinico-radio-histo-molecular and epigenetic landscape
Source: Research Square preprint supplement (doi:10.21203/rs.3.rs-7473307/v1), 2025-09-08
Supplement: Supplementary file 3 [file e88eecd2bb1d65a909e7aea4.docx]

**Table 1. Main characteristics of the study sample (n=1.139)**

| **Parameters** | **Whole series patients**  **(n=1139)** | | |  | **Young adults**  **(n=33)** | | | **Older adults**  **(n=1106)** | | | | **p-value** |
| --- | --- | --- | --- | --- | --- | --- | --- | --- | --- | --- | --- | --- |
|  | **n** | | **%** |  | **n** | **%** |  | | **n** | | **%** |  |  |  |
| **Clinical characteristics** |  |  | |  |  |  |  | |  | |  |  |
| Sex  Female  Male | 483  656 | 42.4  57.6 | |  | 14  19 | 42.4  57.6 |  | | 469  637 | | 42.4  57.6 | 0.575 |
| RTOG-RPA class  3-4  5-6 | 470  669 | 41.3  58.7 | |  | 32  1 | 97.0  3.0 |  | | 438  668 | | 39.6  60.4 | **<0.001** |
| Presenting symptom  Asymptomatic  Epileptic seizure  Increased intracranial pressure  Neurological deficit | 18  294  253  574 | 1.6  25.8  22.2  50.4 | |  | 0  13  17  3 | 0  39.4  51.5  9.1 |  | | 18  281  236  571 | | 1.6  25.4  21.3  51.7 | **<0.001** |
| Increased intracranial pressure at diagnosis | 445 | 39.1 | |  | 23 | 69.7 |  | | 422 | | 38.2 | **<0.001** |
| Neurological deficit at diagnosis | 823 | 72.3 | |  | 12 | 36.4 |  | | 811 | | 73.3 | **<0.001** |
| Epileptic seizures at diagnosis | 367 | 32.2 | |  | 14 | 42.4 |  | | 353 | | 31.9 | 0.140 |
| Preoperative Karnofsky Performance Status score  ≥70  <70 | 863  276 | 75.8  24.2 | |  | 28  5 | 84.8  15.2 |  | | 835  271 | | 75.5  24.5 | 0.151 |
| **Imaging characteristics** |  |  | |  |  |  |  | |  | |  |  |
| Main tumour location  Frontal  Temporal  Parietal  Insular  Other | 379  356  235  39  130 | 33.3  31.3  20.6  3.4  11.4 | |  | 18  11  1  0  3 | 54.6  33.3  3.0  0  9.1 |  | | 362  345  234  39  92 | | 32.7  31.2  21.2  3.5  11.4 | **<0.001** |
| Contrast enhancement (CE)  No  Yes | 26  1113 | 2.3  97.7 | |  | 3  30 | 9.1  90.9 |  | | 23  1083 | | 2.1  97.9 | **0.037** |
| Cortical involvement of the CE  No  Yes | 269  844 | 24.2  75.8 | |  | 4  26 | 13.3  86.7 |  | | 265  818 | | 24.5  75.5 | 0.113 |
| Ventricle involvement of the CE  No  Yes | 439  674 | 39.4  60.6 | |  | 16  14 | 53.3  46.7 |  | | 423  660 | | 39.1  60.9 | 0.084 |
| Multifocal tumour (in FLAIR sequence)  No  Yes | 936  203 | 82.2  17.8 | |  | 30  3 | 90.9  9.1 |  | | 906  200 | | 81.9  18.1 | 0.133 |
| Tumour volume (cm3), median 28.5cm3  <30 cm3  ≥30 cm3 | 588  544 | 51.9  48.1 | |  | 19  14 | 57.6  42.4 |  | | 569  530 | | 51.8  48.2 | 0.316 |
| **Histo-molecular characteristics** |  |  | |  |  |  |  | |  | |  |  |
| MGMT promoter methylation (n=389 available)  Unmethylated  Methylated | 220  169 | 56.6  43.4 | |  | 15  17 | 46.9  53.1 |  | | 205  152 | | 57.4  42.6 | 0.167 |
| **Treatment-related characteristics** |  |  | |  |  |  |  | |  | |  |  |
| Surgical treatment  Biopsy  Surgical resection | 529  610 | 46.4  53.6 | |  | 10  23 | 30.3  69.7 |  | | 519  587 | | 46.9  53.1 | **0.042** |
| Extent of resection of the CE  Partial removal  Subtotal and total removal | 102  508 | 16.7  83.3 | |  | 2  21 | 8.7  91.3 |  | | 100  487 | | 17.0  83.0 | 0.230 |
| Awake surgical procedure  No  Yes | 545  65 | 89.3  10.7 | |  | 18  5 | 78.3  21.7 |  | | 527  60 | | 89.8  10.2 | 0.087 |
| Carmustine wafer implantation  No  Yes | 395  215 | 64.8  35.2 | |  | 18  5 | 78.3  21.7 |  | | 377  210 | | 64.2  35.8 | 0.121 |
| Adverse postoperative events*  No  Yes | 1077  62 | 94.6  5.4 | |  | 29  4 | 87.9  12.1 |  | | 1048  58 | | 94.8  5.2 | 0.198 |
| Postoperative Karnofsky Performance Status score  ≥70  <70 | 851  2988 | 74.7  25.3 | |  | 25  8 | 75.8  24.2 |  | | 826  280 | | 74.7  25.3 | 0.596 |
| Complete Stupp protocol (n=1104)  No  Yes | 515  589 | 46.6  53.4 | |  | 10  22 | 31.2  68.8 |  | | 505  567 | | 45.7  51.2 | 0.247 |
| Delay to oncological treatment  ≤ 8 weeks  > 8 weeks  Not available | 735  60  344 | 64.5  5.3  30.2 | |  | 25  1  7 | 75.8  3.0  21.2 |  | | 710  59  337 | | 64.2  5.3  30.5 | 0.574 |
| * adverse postoperative events within the first postoperative month (hematoma requiring surgical evacuation, postoperative seizures, hydrocephalus, wound-healing defect, cerebrospinal fluid leak, bacterial infection, and systemic thromboembolic complications) | | | | | | | | | |
