# Supplementary material for: Glioblastoma, IDH- and H3-wildtype in young adults: a rare condition with a distinct clinico-radio-histo-molecular and epigenetic landscape
Source: Research Square preprint supplement (doi:10.21203/rs.3.rs-7473307/v1), 2025-09-08
Supplement: Supplementary file 4 [file ed8d5468aadd60da8e868c95.docx]

**Supplementary Table 1. Predictors of progression-free survival in the whole series (n=1.139). Unadjusted and adjusted**

**hazard ratios by Cox proportional hazards model.**

|  | **Unadjusted Hazard Ratio** | | |  | **Adjusted Hazard Ratio** | | |  | |
| --- | --- | --- | --- | --- | --- | --- | --- | --- | --- |
| **Parameters** | **uHR** | **95% CI** | **p-value** |  | **aHR** | **95% CI** | **p-value** | |  | |
| **Clinical characteristics** |  |  |  |  |  |  |  | |  | |
| Age group  Older adults  Young adults | 1 (ref)  0.58 | 0.40-0.84 | **0.004** |  | 1 (ref)  0.67 | 0.45-0.98 | **0.038** | |  | |
| Sex  Female  Male | 1 (ref)  1.05 | 0.93-1.18 | 0.441 |  |  |  |  | |  | |
| Increase intracranial pressure at diagnosis  No  Yes | 1 (ref)  0.95 | 0.84-1.07 | 0.381 |  |  |  |  | |  | |
| Neurological deficit at diagnosis  No  Yes | 1 (ref)  1.36 | 1.19-1.55 | **<0.001** |  |  |  |  | |  | |
| Epileptic seizures at diagnosis  No  Yes | 1 (ref)  0.79 | 0.69-0.90 | **<0.001** |  | 1 (ref)  0.89 | 0.768-1.02 | 0.092 | |  | |
| Preoperative Karnofsky Performance Status score  ≥70  <70 | 1 (ref)  1.68 | 1.46-1.93 | **<0.001** |  |  |  |  | |  | |
| RTOG-RPA class  3-4  5-6 | 1 (ref)  1.82 | 1.61-2.06 | **<0.001** |  |  |  |  | |  | |
| **Imaging characteristics** |  |  |  |  |  |  |  | |  | |
| Contrast enhancement  No  Yes | 1 (ref)  1.59 | 1.04-2.43 | **0.032** |  | 1 (ref)  2.27 | 1.48-3.48 | **<0.001** | |  | |
| Cortical involvement of the CE (n=1123)  No  Yes | 1 (ref)  0.69 | 0.60-0.79 | **<0.001** |  |  |  |  | |  | |
| Ventricle involvement of the CE (n=1123)  No  Yes | 1 (ref)  1.46 | 1.29-1.65 | **<0.001** |  |  |  |  | |  | |
| Multifocal tumour (in FLAIR sequence)  No  Yes | 1 (ref)  1.31 | 1.12-1.53 | **<0.001** |  |  |  |  | |  | |
| Tumour volume (cm3), median 28.5cm3  <30 cm3  ≥30 cm3 | 1 (ref)  1.20 | 1.06-1.35 | **0.004** |  |  |  |  | |  | |
| **Histo-molecular characteristics** |  |  |  |  |  |  |  | |  | |
| MGMT promoter methylation  Unmethylated  Methylated | 1 (ref)  0.67 | 0.54-0.82 | **<0.001** |  |  |  |  | |  | |
| **Treatment-related characteristics** |  |  |  |  |  |  |  | |  | |
| Surgical treatment  Biopsy  Surgical resection | 1 (ref)  0.59 | 0.47-0.74 | **<0.001** |  | 1 (ref)  0.59 | 0.52-0.68 | **<0.001** | |  | |
| Extent of resection of the CE (n=615)  Partial removal  Subtotal and total removal | 1 (ref)  0.48 | 0.43-0.55 | **<0.001** |  |  |  |  | |  | |
| Awake surgical procedure (n=615)  No  Yes | 1 (ref)  0.55 | 0.41-0.73 | **<0.001** |  | 1 (ref)  0.75 | 0.56-1.00 | 0.052 | |  | |
| Carmustine wafer implantation (n=615)  No  Yes | 1 (ref)  0.98 | 0.83-1.17 | 0.985 |  |  |  |  | |  | |
| Adverse postoperative events*  No  Yes | 1 (ref)  1.17 | 0.90-1.52 | 0.250 |  |  |  |  | |  | |
| Postoperative Karnofsky Performance Status score  ≥70  <70 | 1 (ref)  1.99 | 1.73-2.29 | **<0.001** |  | 1 (ref)  1.47 | 1.27-1.71 | **<0.001** | |  | |
| Complete Stupp protocol (n=1114 available)  No  Yes | 1 (ref)  0.32 | 0.29-0.37 | **<0.001** |  | 1 (ref)  0.39 | 0.34-0.44 | **<0.001** | |  | |
| Delay to oncological treatment (n=800 available)  ≤ 8 weeks  > 8 weeks | 1 (ref)  0.96 | 0.73-1.26 | 0.768 |  |  |  |  | |  | |

CI: confidence interval; HR: Hazard ratio. * adverse postoperative events within the first postoperative month (hematoma requiring surgical evacuation, postoperative seizures, hydrocephalus
