# Supplementary material for: Glioblastoma, IDH- and H3-wildtype in young adults: a rare condition with a distinct clinico-radio-histo-molecular and epigenetic landscape
Source: Research Square preprint supplement (doi:10.21203/rs.3.rs-7473307/v1), 2025-09-08
Supplement: Supplementary file 5 [file fbde4e3d4beab15bbde05d77.docx]

**Table 2. Predictors of overall survival in young adult patients (n=33). Unadjusted and adjusted hazard**

**ratios by Cox proportional hazards model.**

|  | **Unadjusted Hazard Ratio** | | |  | **Adjusted Hazard Ratio** | | |  | |
| --- | --- | --- | --- | --- | --- | --- | --- | --- | --- |
| **Parameters** | **uHR** | **95% CI** | **p-value** |  | **aHR** | **95% CI** | **p-value** | |  | |
| **Clinical characteristics** |  |  |  |  |  |  |  | |  | |
| Sex  Female  Male | 1 (ref)  1.18 | 0.55-2.55 | 0.670 |  |  |  |  | |  | |
| Increase intracranial pressure at diagnosis  No  Yes | 1 (ref)  0.80 | 0.35-1.83 | 0.591 |  |  |  |  | |  | |
| Neurological deficit at diagnosis  No  Yes | 1 (ref)  1.19 | 0.55-2.58 | 0.653 |  |  |  |  | |  | |
| Epileptic seizures at diagnosis  No  Yes | 1 (ref)  0.90 | 0.42-1.93 | 0.776 |  |  |  |  | |  | |
| Preoperative Karnofsky Performance Status score  ≥70  <70 | 1 (ref)  3.22 | 1.16-8.91 | **0.024** |  | 1 (ref)  1.44 | 0.36-5.82 | 0.607 | |  | |
| **Imaging characteristics** |  |  |  |  |  |  |  | |  | |
| Contrast enhancement  No  Yes | 1 (ref)  2.68 | 0.36-20.13 | 0.338 |  |  |  |  | |  | |
| Cortical involvement of the CE (n=30)  No  Yes | 1 (ref)  0.15 | 0.04-0.52 | **0.003** |  |  |  |  | |  | |
| Ventricle involvement of the CE (n=30)  No  Yes | 1 (ref)  1.24 | 0.56-2.75 | 0.601 |  |  |  |  | |  | |
| Multifocal tumour (in FLAIR sequence)  No  Yes | 1 (ref)  1.36 | 0.32-5.83 | 0.682 |  |  |  |  | |  | |
| Tumour volume (cm3), median 28.5cm3  <30 cm3  ≥30 cm3 | 1 (ref)  0.60 | 0.26-1.40 | 0.240 |  |  |  |  | |  | |
| **Histo-molecular characteristics** |  |  |  |  |  |  |  | |  | |
| MGMT promoter methylation  Unmethylated  Methylated | 1 (ref)  1.64 | 0.74-3.63 | 0.216 |  | 1 (ref)  0.76 | 0.24-2.40 | 0.639 | |  | |
| **Epigenetic characteristics** |  |  |  |  |  |  |  | |  | |
| DNA-methylation class  Pediatric HGG  Mesenchymal  RTK group | 1 (ref)  2.83  5.70 | 0.74-10.8  1.35-24.1 | 0.127  **0.018** |  | 1 (ref)  4.72  8.55 | 1.04-21.4  1.53-47.9 | **0.044**  **0.015** | |  | |
| **Treatment-related characteristics** |  |  |  |  |  |  |  | |  | |
| Surgical treatment  Biopsy  Surgical resection | 1 (ref)  0.17 | 0.06-0.45 | **<0.001** |  | 1 (ref)  0.17 | 0.04-0.68 | **0.012** | |  | |
| Extent of resection of the CE (n=23)  Partial removal  Subtotal and total removal | 1 (ref)  1.07 | 0.13-8.46 | 0.951 |  |  |  |  | |  | |
| Awake surgical procedure (n=23)  No  Yes | 1 (ref)  0.36 | 0.08-1.56 | 0.171 |  |  |  |  | |  | |
| Adverse postoperative events*  No  Yes | 1 (ref)  2.40 | 0.80-7.21 | 0.119 |  |  |  |  | |  | |
| Postoperative Karnofsky Performance Status score  ≥70  <70 | 1 (ref)  1.89 | 0.79-4.53 | 0.152 |  |  |  |  | |  | |
| Complete Stupp protocol  No  Yes | 1 (ref)  0.60 | 0.27-1.34 | 0.212 |  | 1 (ref)  0.34 | 0.11-1.07 | 0.065 | |  | |
| Delay to oncological treatment  ≤ 8 weeks  > 8 weeks | 1 (ref)  0.54 | 0.07-4.03 | 0.538 |  |  |  |  | |  | |

CI: confidence interval; HR: Hazard ratio. * adverse postoperative events within the first postoperative month (hematoma requiring surgical evacuation, postoperative seizures, hydrocephalus
